# Supplementary material for: Decentralized governance and artificial intelligence policy with blockchain-based voting in federated learning
Source: Frontiers journal article supplement (doi:10.3389/frma.2023.1035123), 2023-02-16
Supplement: Table_1.DOCX [file Table_1.DOCX]

## Table

Table 1. Indonesia Mango Export Value sourced at tridge.com and Maximum number of sensing devices (2013-2020)

| Year | Export Value USD | EV * (L% - R%) | Sensing devices budget (N sets) |
| --- | --- | --- | --- |
| 2013 | 7330000 | 503937.5 | 2290 |
| 2014 | 8530000 | 586437.5 | 2665 |
| 2015 | 19260000 | 1324125 | 6018 |
| 2016 | 21150000 | 1454063 | 6609 |
| 2017 | 5310000 | 365062.5 | 1659 |
| 2018 | 34700000 | 2385625 | 10843 |
| 2019 | 44530000 | 3061438 | 13915 |
| 2020 | 82490000 | 5671188 | 25777 |

Table 2. Mango shelf-life in an export cycle

| Token id | 1st Harvest  Step 1 | 2nd Harvest  Step 2 | 3rd Harvest  Step 3 | 4th Harvest  Step 4 | Export 1  Step 5 |
| --- | --- | --- | --- | --- | --- |
| 1 | +0.5 day | +1 day | +1.5 days | +2 days | Reset |
| 2 |  | +0.5 day | +1 day | +1.5 days | Reset |
| 3 |  |  | +0.5 day | +1 day | Reset |
| 4 |  |  |  | +0.5 day | Reset |

Table 3. Test Score Root-Mean-Square Deviation (RMSE) and Epoch for Forecasting

| dataset[:N] maintains loss at 1e-5 | | |
| --- | --- | --- |
| N | Epoch | Test score RMSE |
| 200 | 4153 | 0.25 |
| 400 | 6368 | 0.2 |
| 600 | 6863 | 0.22 |
| 800 | 6155 | 0.17 |
| 1000 | 4885 | 0.15 |
| 1200 | 4250 | 0.23 |
| 1400 | 7698 | 0.21 |
| 1600 | 5619 | 0.21 |
| 1800 | 3775 | 0.21 |
| 2000 | 5310 | 0.3 |
| 2200 | 4812 | 0.35 |
| 2400 | 3528 | 0.34 |
